# Supplementary material
Source: Springer Nature journal article supplement (https://www.springermedizin.de/resource/supplementary/13019_2010_266_MOESM1_ESM.pdf/9638258)

**A.**

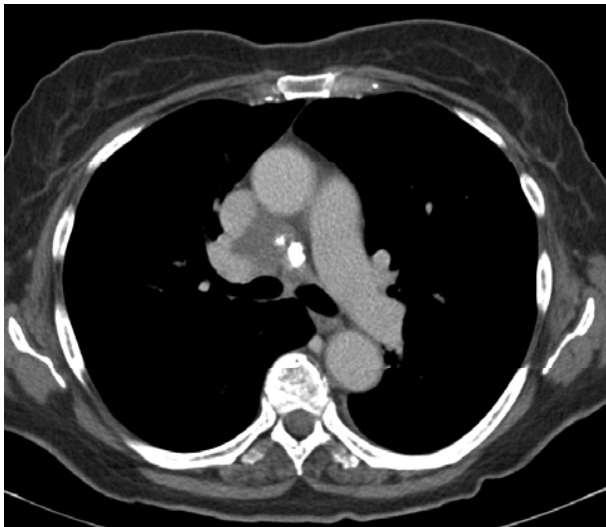

**B.**

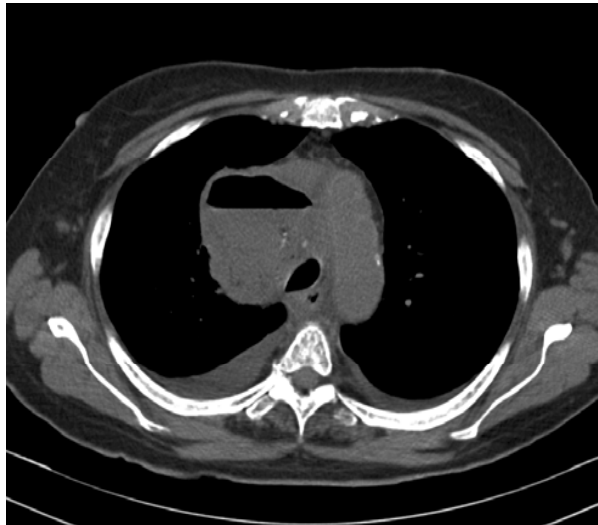

Supplement: MOESM1 [file 9638258]
